# Supplementary material for: Risk of Pharmacological or Hospital Treatment for Depression in Patients with Colorectal Cancer–Associations with Pre-Cancer Lifestyle, Comorbidity and Clinical Factors
Source: MDPI journal article supplement (doi:10.3390/cancers13081979), 2021-04-20
Supplement: s1 [file s1]

# Risk of Pharmacological or Hospital Treatment for Depression in Patients with Colorectal Cancer—Associations with Pre-Cancer Lifestyle, Comorbidity and Clinical Factors

Trille Kristina Kjaer, Ida Rask Moustsen-Helms, Vanna Albieri, Signe Benzon Larsen, Thea Helene Degett, Anne Tjønneland, Christoffer Johansen, Susanne K. Kjaer, Ismail Gogenur and Susanne Oksbjerg Dalton

**Table S1.** Lifestyle, clinical and treatment related risk factors for depression for 1048 patients with colorectal cancer with stage I–III

| -                                         | Person years | No events | Adjusted <sup>1</sup><br>HR (95 % CI) |
|-------------------------------------------|--------------|-----------|---------------------------------------|
| Lifestyle <sup>2</sup>                    |              |           |                                       |
| Smoking                                   |              |           |                                       |
| Current                                   | 1586         | 53        | 1.51 (0.97–2.34)                      |
| Former                                    | 1689         | 44        | 1.20 (0.76–1.89)                      |
| Never                                     | 1594         | 35        | reference                             |
| Alcohol consumption per week <sup>3</sup> |              |           |                                       |
| Abstainers                                | 325          | 7         | 0.70 (0.32–1.52)                      |
| Moderate use                              | 3756         | 99        | reference                             |
| Excessive use                             | 763          | 25        | 1.29 (0.82–2.04)                      |
| Body Mass Index (kg/m <sup>3</sup> )      |              |           |                                       |
| <25                                       | 1817         | 55        | reference                             |
| >25 and <30                               | 2226         | 50        | 0.72 (0.48–1.07)                      |
| >30                                       | 827          | 27        | 0.98 (0.61–1.57)                      |
| Physical activity                         |              |           |                                       |
| MET score in quartiles <sup>4</sup>       |              |           |                                       |
| 1 <sup>st</sup> quartile (least active)   | 1165         | 33        | 1.21 (0.76–1.95)                      |
| 2 <sup>nd</sup> quartile                  | 1149         | 25        | 0.91 (0.57–1.48)                      |
| 3 <sup>rd</sup> quartile                  | 1408         | 36        | 0.80 (0.47–1.36)                      |
| 4 <sup>th</sup> quartile (most active)    | 1147         | 38        | reference                             |
| Charlson Comorbidity Index <sup>5</sup>   |              |           |                                       |
| 0–1                                       | 2907         | 54        | reference                             |
| 2                                         | 1429         | 45        | 1.67 (1.11–2.52)                      |
| ≥3                                        | 534          | 33        | 3.17 (2.02–4.98)                      |
| Clinical factors                          |              |           |                                       |
| Cancer type                               |              |           |                                       |
| Colon                                     | 2946         | 83        | reference                             |
| Rectum                                    | 1924         | 49        | 0.96 (0.67–1.39)                      |
| Stage                                     |              |           |                                       |
| 1                                         | 1224         | 32        | reference                             |
| 2                                         | 2055         | 50        | 0.91 (0.58–1.42)                      |
| 3                                         | 1591         | 50        | 1.15 (0.73–1.79)                      |
| Treatment                                 |              |           |                                       |
| Surgery <sup>7</sup>                      |              |           |                                       |
| no                                        | -            | -         | reference                             |
| yes                                       | -            | -         | 1.68 (0.49–5.78)                      |
| Surgical complications <sup>7</sup>       |              |           |                                       |
| no                                        | -            | -         | 1.56 (0.45–5.39)                      |
| yes                                       | -            | -         | 2.30 (0.63–8.31)                      |
| Stoma <sup>7</sup>                        |              |           |                                       |
| no                                        | -            | -         | 1.50 (0.43–5.21)                      |
| yes                                       | -            | -         | 2.31 (0.64–8.35)                      |
| Radiotherapy                              |              |           |                                       |
| no                                        | 4279         | 105       | reference                             |

|              |      |    |                  |
|--------------|------|----|------------------|
| yes          | 591  | 27 | 2.48 (1.48–4.17) |
| Chemotherapy |      |    |                  |
| no           | 3323 | 89 | reference        |
| yes          | 1547 | 43 | 1.03 (0.66–1.61) |

<sup>1</sup> Adjusted for sex, age at inclusion, time since enrollment in the Diet, Cancer and Health Cohort, education, disease stage and cancer type.<sup>2</sup> At time of enrollment in the Diet, Cancer and Health Cohort.<sup>3</sup> Based on recommendations from the Danish Health Authorities at time of enrollement. Moderate use, 1–14 drinks per week for women and 1–21 drinks per week for men. Excessive use, >14 drinks per week for women and > 21 drinks per week for men. <sup>4</sup> The metabolic equivalent of task, i.e., a measure of energy cost of physical activities. Calculated as kcal/kg/hour from an average of summer and winter physical activity multiplied by number of hours per week. 1<sup>st</sup> quartile: <=14.5 (least active), 2<sup>nd</sup> quartile: 14.5 – 26, 3<sup>rd</sup> quartile: >26 – 43.8, 4<sup>th</sup> quartile (most active): >43.8. <sup>5</sup> Comorbidity is classified according to a modified the Charlson Comorbidity Index (CCI) excluding cancer. <sup>7</sup> Information not shown due to low frequencies.

**Table S2.** Lifestyle related risk factors for depression for 1324 patients with colorectal cancer using information from the Danish Colorectal Cancer Group database at time of diagnosis.

| -                                    | Person Years | No Events | Adjusted <sup>1</sup><br>HR (95 % CI) |
|--------------------------------------|--------------|-----------|---------------------------------------|
| Lifestyle                            |              |           |                                       |
| Smoking                              |              |           |                                       |
| Current                              | 739          | 26        | 1.05 (0.64–1.70)                      |
| Former                               | 1865         | 59        | 1.00 (0.68–1.47)                      |
| Never                                | 1586         | 56        | reference                             |
| Alcohol consumption per week (units) |              |           |                                       |
| Abstainers                           | 458          | 21        | 1.02 (0.62–1.68)                      |
| 1–14                                 | 2570         | 90        | reference                             |
| 15–21                                | 542          | 16        | 0.98 (0.56–1.69)                      |
| >21                                  | 506          | 13        | 0.79 (0.42–1.49)                      |
| Body Mass Index (kg/m <sup>3</sup> ) |              |           |                                       |
| <25                                  | 1981         | 75        | reference                             |
| >25 and <30                          | 1561         | 42        | 0.82 (0.56–1.22)                      |
| >30                                  | 684          | 26        | 1.08 (0.68–1.70)                      |

<sup>1</sup> Adjusted for sex, age at inclusion, education, cancer stage and cancer type.

**Publisher's Note:** MDPI stays neutral with regard to jurisdictional claims in published maps and institutional affiliations.

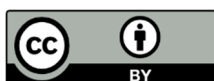

© 2021 by the authors. Licensee MDPI, Basel, Switzerland. This article is an open access article distributed under the terms and conditions of the Creative Commons Attribution (CC BY) license (<http://creativecommons.org/licenses/by/4.0/>).
